# Supplementary material for: Closing the mortality gap after a myocardial infarction in people with and without chronic obstructive pulmonary disease
Source: PubMed Central journal article supplement (PMC4516011; doi:10.1136/heartjnl-2014-307251), 2015-03-12

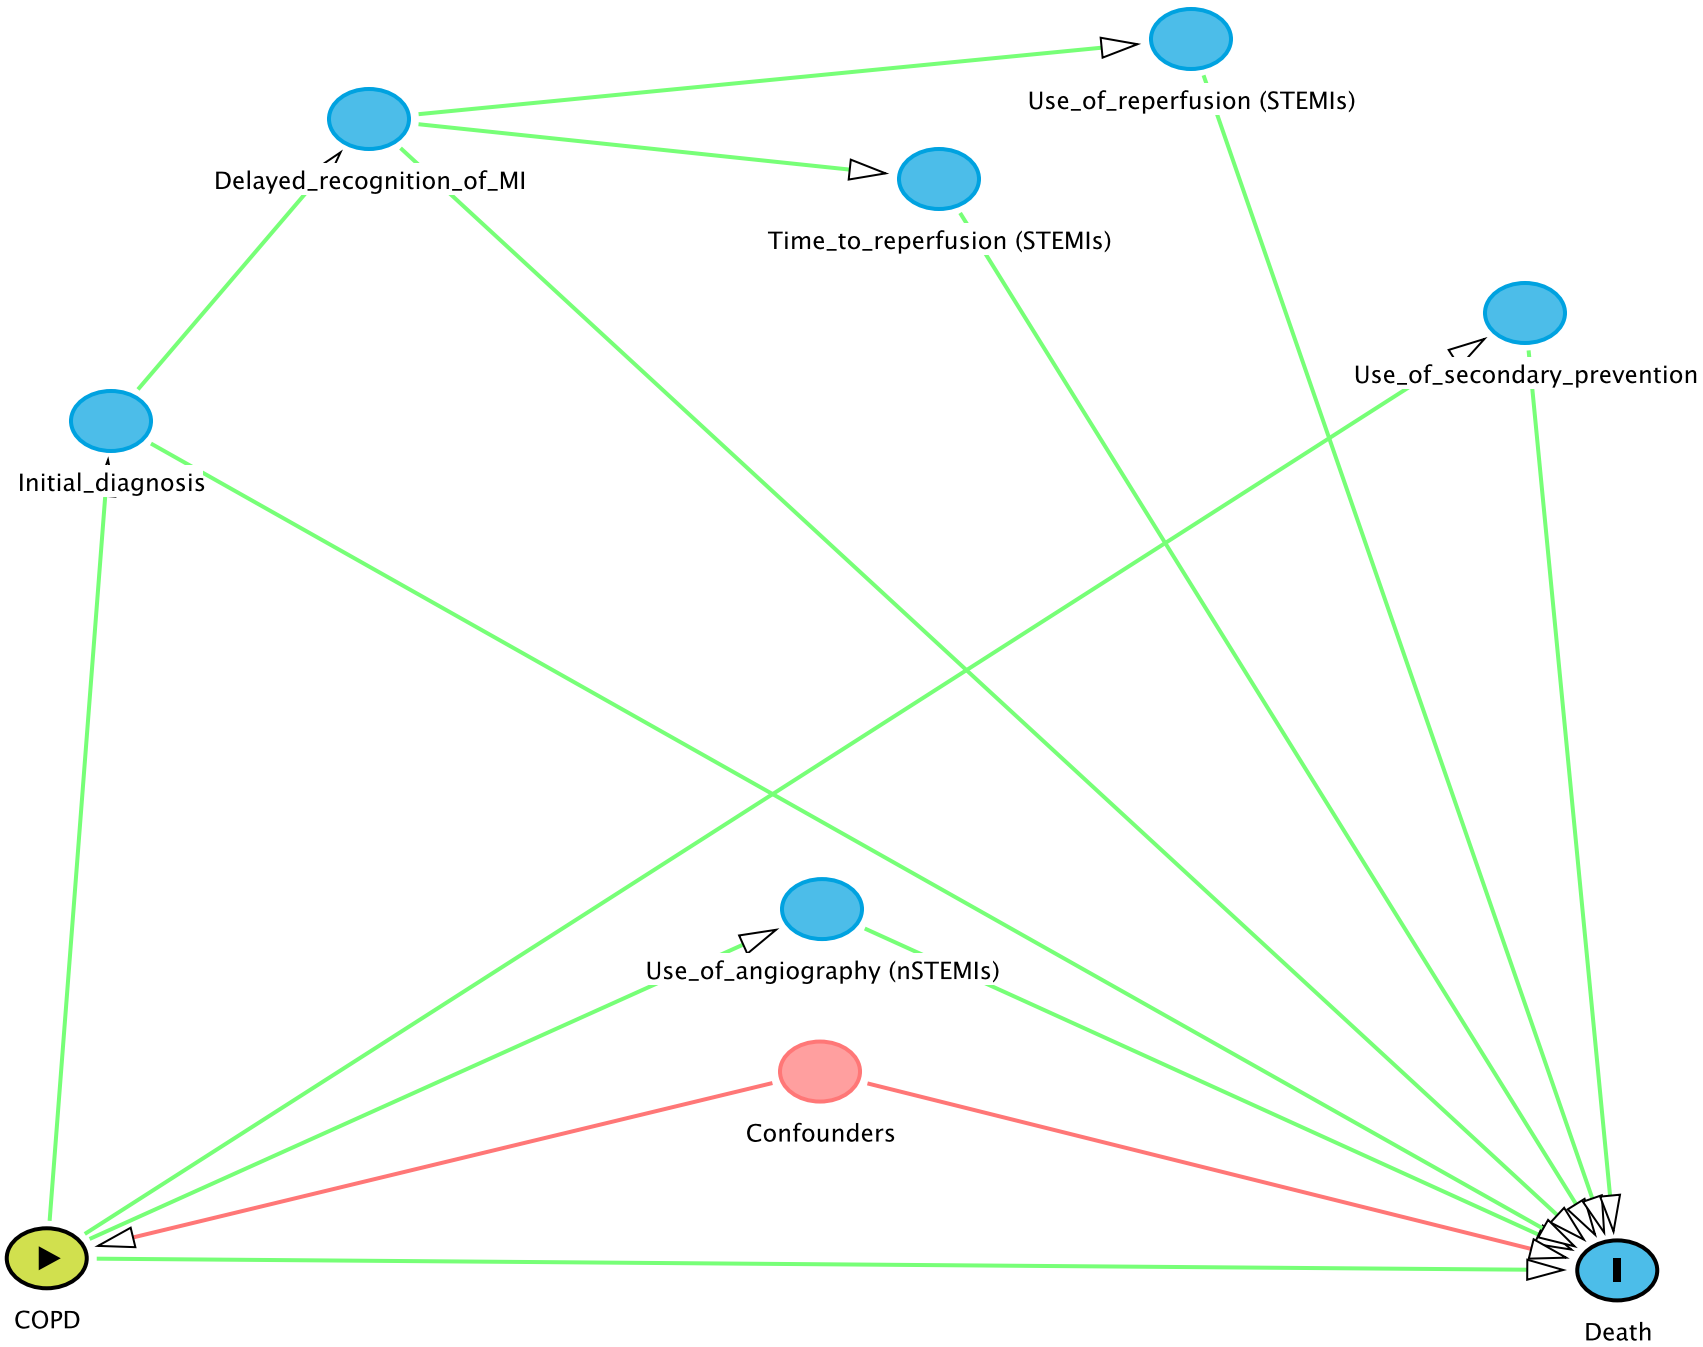

Supplement: heartjnl-2014-307251-s2.pdf [file heartjnl-2014-307251-s2.pdf]
